# Supplementary material
Source: HighWire-hosted journal article supplement (https://bibliotheek.ehb.be/content/suppl/2023/10/12/bmjgh-2023-012633)
Supplement: bmjgh-2023-012633supp003_data_supplement.pdf [file bmjgh-2023-012633supp003_data_supplement.pdf]

Supplementary File 3

Pre-specified Analyses: multilevel mixed effects Poisson regression

Primary Outcome: Proportion of five key potential handwashing events that were accompanied by HWWS (both hands) for children aged 5-12 years

Table 1: Effect of intervention on the proportion of key handwashing events accompanied by HWWS

|                 | Interventio<br>n | Control     | Rate Ratio * | 95% CI  | P value |
|-----------------|------------------|-------------|--------------|---------|---------|
| Baseline (n, %) | 67 (12.4%)       | 50 (10.6%)  | 1.2          | 0.6-2.5 | 0.54    |
| Week 4 (n, %)   | 189 (38.9%)      | 146 (33.0%) | 1.2          | 0.7-1.8 | 0.53    |
| Week 12 (n, %)  | 189 (40.3%)      | 208 (50.1%) | 0.9          | 0.6-1.3 | 0.57    |
| Week 16 (n, %)  | 198 (48.3%)      | 174 (45.9%) | 1.2          | 0.8-1.7 | 0.47    |

Multilevel mixed effects Poisson regression for rates accounting for clustering at the household level  
\* Adjusted for age, sex, number of children aged 5–12 in the household, and number of household members earning an income

Secondary Outcome 1: Proportion of all observed handwashing events (handwashing with water) where soap was used

Table 2: Effect of intervention on the proportion of all handwashes that used soap

|                 | Interventio<br>n | Control     | Risk Ratio* | 95% CI  | P value |
|-----------------|------------------|-------------|-------------|---------|---------|
| Baseline (n, %) | 81 (20.2%)       | 63 (17.4%)  | 1.4         | 0.8-2.4 | 0.26    |
| Week 4 (n, %)   | 205 (49.4%)      | 157 (46.2%) | 1.1         | 0.8-1.5 | 0.76    |
| Week 12 (n, %)  | 196 (51.3%)      | 228 (63.5%) | 0.9         | 0.7-1.2 | 0.32    |
| Week 16 (n, %)  | 215 (58.7%)      | 194 (59.0%) | 1.0         | 0.8-1.4 | 0.84    |

Multilevel mixed effects Poisson regression for rates accounting for clustering at the household level  
\* Adjusted for age, sex, number of children aged 5–12 in the household, and number of household members earning an income

Secondary Outcome 2: Total number of observed HWWS events across all timepoints

Table 3: Effect of intervention on the total number of handwashes with soap

|              | Intervention | Control | Count Ratio * | 95% CI  | P value |
|--------------|--------------|---------|---------------|---------|---------|
| Baseline (n) | 81           | 63      | 1.5           | 0.8-2.9 | 0.22    |
| Week 4 (n)   | 205          | 157     | 1.3           | 0.8-2.0 | 0.34    |
| Week 12 (n)  | 196          | 228     | 0.9           | 0.6-1.4 | 0.68    |
| Week 16 (n)  | 215          | 194     | 1.2           | 0.7-2.1 | 0.42    |

Multilevel mixed effects Poisson regression for counts accounting for clustering at the household level  
\* Adjusted for age, sex, number of children aged 5–12 in the household, and number of household members earning an income

**Robustness Check: adjusting analysis for enumerator identity**

Primary Outcome: Proportion of five key potential handwashing events that were accompanied by HWWS (both hands) for children aged 5-12 years

**Table 1: Effect of intervention on the proportion of key handwashing events accompanied by HWWS**

|                        | Interventio<br>n | Control      | Rate Ratio * | 95% CI  | P value |
|------------------------|------------------|--------------|--------------|---------|---------|
| <b>Baseline (n, %)</b> | 67 (12.4%)       | 50 (10.6%)   | 1.0          | 0.6-1.6 | 1.00    |
| <b>Week 4 (n, %)</b>   | 189 (38.9%)      | 1.46 (33.0%) | 1.2          | 0.8-1.7 | 0.46    |
| <b>Week 12 (n, %)</b>  | 189 (40.3%)      | 208 (50.1%)  | 0.8          | 0.5-1.1 | 0.13    |
| <b>Week 16 (n, %)</b>  | 198 (48.3%)      | 174 (45.9%)  | 1.1          | 0.8-1.5 | 0.60    |

Poisson for rates generalized estimating equations analyses accounting for clustering at the household level

\* Adjusted for age, sex, number of children aged 5–12 in the household, number of household members earning an income, and enumerator identity

Secondary Outcome 1: Proportion of all observed handwashing events (handwashing with water) where soap was used

**Table 2: Effect of intervention on the proportion of all handwashes that used soap**

|                        | Interventio<br>n | Control     | Risk Ratio* | 95% CI  | P value |
|------------------------|------------------|-------------|-------------|---------|---------|
| <b>Baseline (n, %)</b> | 81 (20.2%)       | 63 (17.4%)  | 1.1         | 0.7-1.7 | 0.68    |
| <b>Week 4 (n, %)</b>   | 205 (49.4%)      | 157 (46.2%) | 1.0         | 0.8-1.4 | 0.78    |
| <b>Week 12 (n, %)</b>  | 196 (51.3%)      | 228 (63.5%) | 0.8         | 0.6-1.1 | 0.16    |
| <b>Week 16 (n, %)</b>  | 215 (58.7%)      | 194 (59.0%) | 1.0         | 0.8-1.3 | 0.89    |

Poisson for rates generalized estimating equations analyses accounting for clustering at the household level

\* Adjusted for age, sex, number of children aged 5–12 in the household, number of household members earning an income, and enumerator identity

Secondary Outcome 2: Total number of observed HWWS events across all timepoints

**Table 3: Effect of intervention on the total number of handwashes with soap**

|                     | Intervention | Control | Count Ratio * | 95% CI  | P value |
|---------------------|--------------|---------|---------------|---------|---------|
| <b>Baseline (n)</b> | 81           | 63      | 1.1           | 0.7-1.7 | 0.78    |
| <b>Week 4 (n)</b>   | 205          | 157     | 1.2           | 0.8-1.7 | 0.47    |
| <b>Week 12 (n)</b>  | 196          | 228     | 0.8           | 0.5-1.1 | 0.10    |
| <b>Week 16 (n)</b>  | 215          | 194     | 1.1           | 0.8-1.4 | 0.70    |

Poisson for counts generalized estimating equations analyses accounting for clustering at the household level

\* Adjusted for age, sex, number of children aged 5–12 in the household, number of household members earning an income, and enumerator identity

Subgroup Analyses 1: Age of child observed

Subgroup 1: Child observed in age group 5-8

|                 | Interventio<br>n | Control      | Rate Ratio * | 95% CI  | P value |
|-----------------|------------------|--------------|--------------|---------|---------|
| Baseline (n, %) | 67 (12.4%)       | 50 (10.6%)   | 1.4          | 0.7-2.9 | 0.42    |
| Week 4 (n, %)   | 189 (38.9%)      | 1.46 (33.0%) | 1.4          | 0.9-2.3 | 0.18    |
| Week 12 (n, %)  | 189 (40.3%)      | 208 (50.1%)  | 0.9          | 0.6-1.3 | 0.58    |
| Week 16 (n, %)  | 198 (48.3%)      | 174 (45.9%)  | 1.0          | 0.7-1.4 | 0.98    |

Poisson for rates generalized estimating equations analyses accounting for clustering at the household level  
\* Adjusted for sex, number of children aged 5–12 in the household, and number of household members earning an income.

Subgroup 2: Child observed in age group 9-12

|                 | Interventio<br>n | Control      | Rate Ratio * | 95% CI  | P value |
|-----------------|------------------|--------------|--------------|---------|---------|
| Baseline (n, %) | 67 (12.4%)       | 50 (10.6%)   | 0.7          | 0.3-1.5 | 0.35    |
| Week 4 (n, %)   | 189 (38.9%)      | 1.46 (33.0%) | 1.0          | 0.6-1.6 | 0.90    |
| Week 12 (n, %)  | 189 (40.3%)      | 208 (50.1%)  | 0.7          | 0.4-1.0 | 0.07    |
| Week 16 (n, %)  | 198 (48.3%)      | 174 (45.9%)  | 1.2          | 0.7-1.8 | 0.54    |

Poisson for rates generalized estimating equations analyses accounting for clustering at the household level  
\* Adjusted for sex, number of children aged 5–12 in the household, and number of household members earning an income.

Subgroup Analyses 2: Number of children aged 5-12 living in the household

Primary Outcome: Proportion of five key potential handwashing events that were accompanied by HWWS (both hands) for children aged 5-12 years

Subgroup 1: Number of children aged 5-12 living in the household = ≤3

|                 | Interventio<br>n | Control      | Rate Ratio * | 95% CI  | P value |
|-----------------|------------------|--------------|--------------|---------|---------|
| Baseline (n, %) | 67 (12.4%)       | 50 (10.6%)   | 0.8          | 0.4-1.6 | 0.47    |
| Week 4 (n, %)   | 189 (38.9%)      | 1.46 (33.0%) | 0.9          | 0.6-1.5 | 0.75    |
| Week 12 (n, %)  | 189 (40.3%)      | 208 (50.1%)  | 0.8          | 0.5-1.2 | 0.28    |
| Week 16 (n, %)  | 198 (48.3%)      | 174 (45.9%)  | 1.0          | 0.6-1.4 | 0.80    |

Poisson for rates generalized estimating equations analyses accounting for clustering at the household level  
\* Adjusted for age, sex, and number of household members earning an income.

Subgroup 2: Number of children aged 5-12 living in the household = >3

|                 | Interventio<br>n | Control      | Rate Ratio * | 95% CI  | P value |
|-----------------|------------------|--------------|--------------|---------|---------|
| Baseline (n, %) | 67 (12.4%)       | 50 (10.6%)   | 2.5          | 0.7-8.1 | 0.14    |
| Week 4 (n, %)   | 189 (38.9%)      | 1.46 (33.0%) | 2.2          | 1.0-5.0 | 0.06    |
| Week 12 (n, %)  | 189 (40.3%)      | 208 (50.1%)  | 0.7          | 0.4-1.4 | 0.34    |
| Week 16 (n, %)  | 198 (48.3%)      | 174 (45.9%)  | 1.4          | 0.8-2.4 | 0.27    |

Poisson for rates generalized estimating equations analyses accounting for clustering at the household level  
\* Adjusted for age sex, and number of household members earning an income.
